# Supplementary material
Source: PubMed Central journal article supplement (PMC4409816)
Supplement: emi0017-0829-sd1.pdf [file emi0017-0829-sd1.pdf]

**Figure S1.** Complete phylogenetic trees (NJ) of the 16S-23S ITS and the *glnA* sequences (compare Fig. 1b). Subgroups mentioned in the paper are highlighted by different colours. Strains matching the RLBH probe F13n (Jezbera et al., 2011) targeting the Pantropical clade, and strains matching the PCR primers used for targeting the major branch of the Antarctic clade (this study) are indicated by brackets.

# 16S-23S ITS

# *glnA*

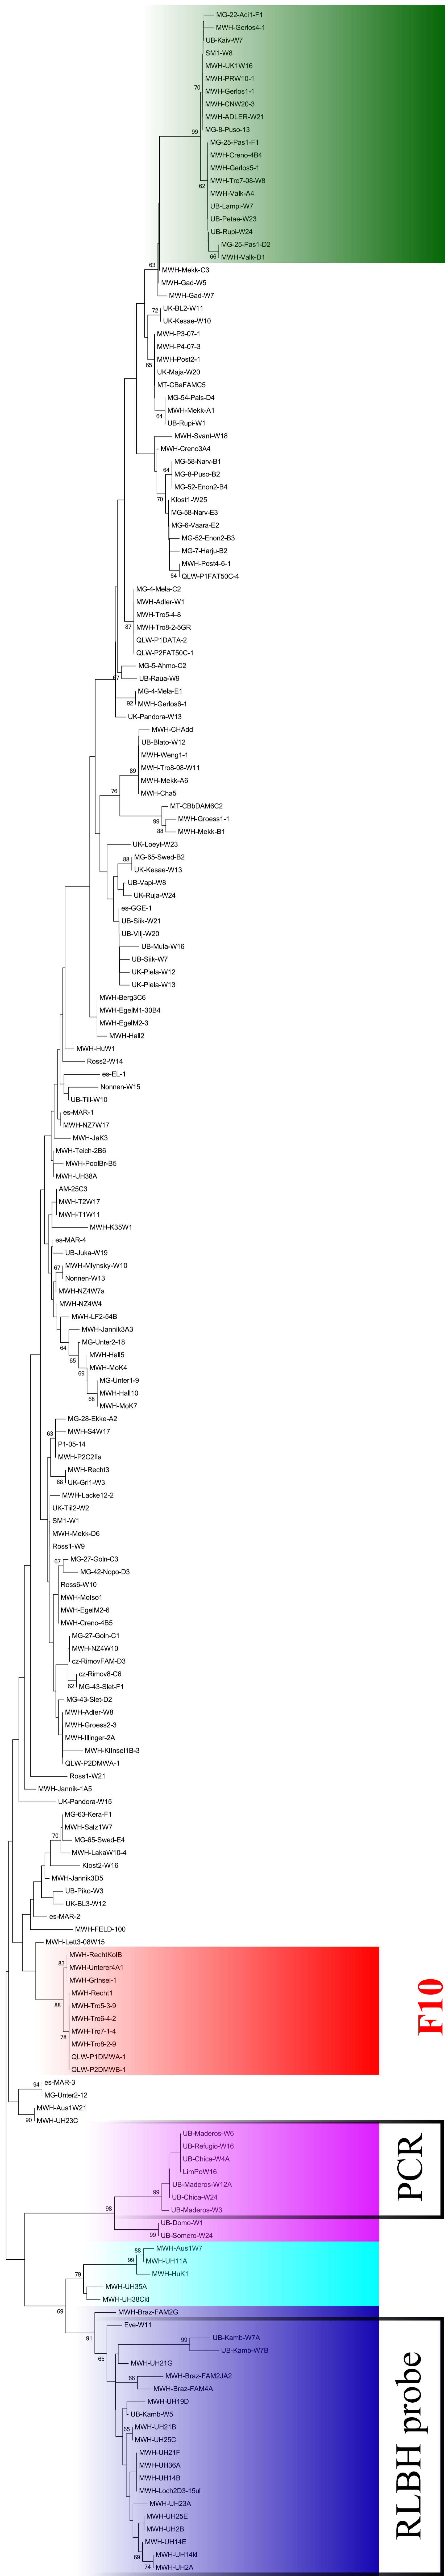

**F15**

**Subtop.-  
Tropical  
Clade**

**Subtop.-  
Antarctic  
Clade**

**Pantropical  
Clade**

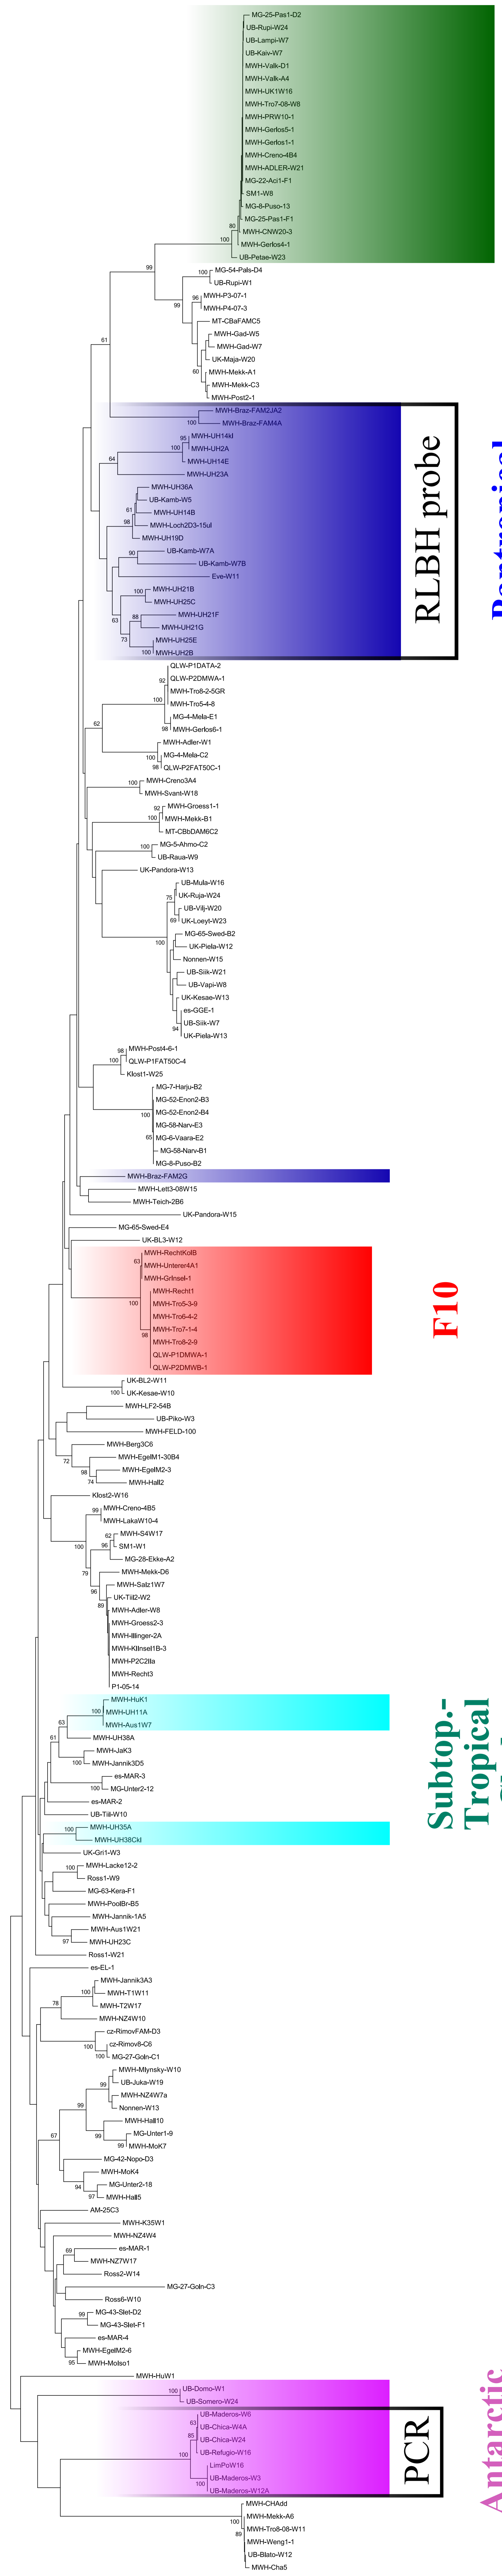

**F15**

**Pantropical  
Clade**

**Subtop.-  
Tropical  
Clade**

**Antarctic  
Clade**
