# Supplementary material
Source: PubMed Central journal article supplement (PMC4409816)

**Figure S2.** Putative range limits of the Pantropical (red), the Antarctic (blue), and the F15 clade (yellow). Range limits deduced from detections by cultivation and cultivation-independent methods are shown as solid lines (Pantropical and F15 clade) or a dot (Antarctic clade, region represented by Byers Peninsula and Hope Bay). Hypothetical range limits are shown as dashed lines.

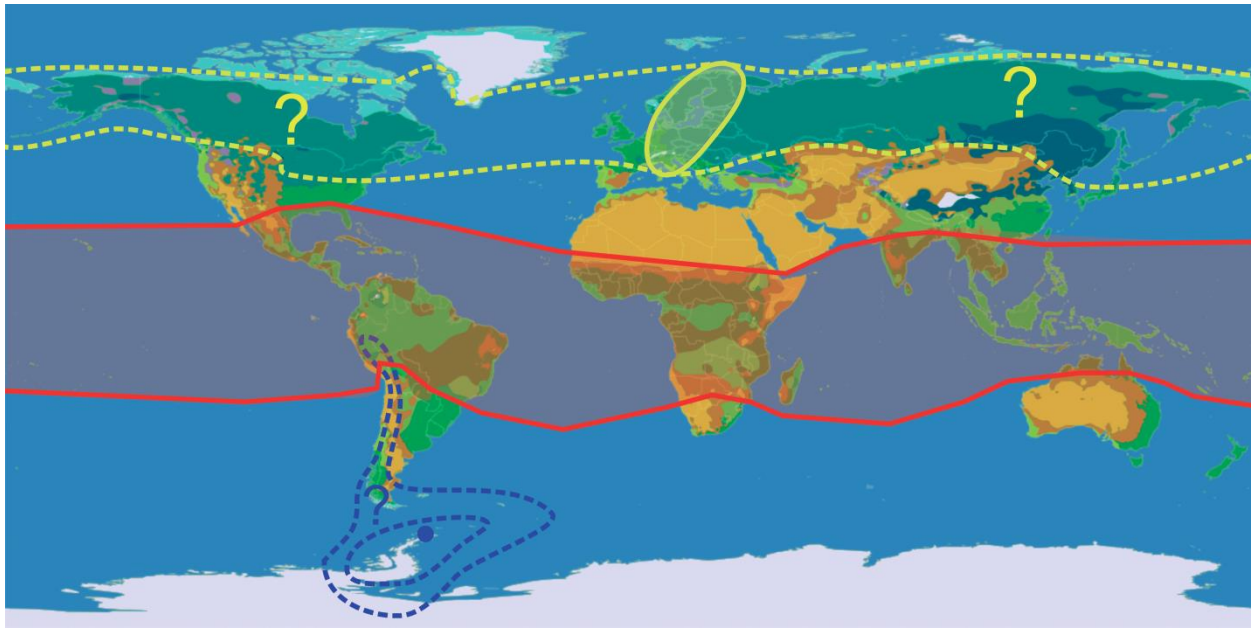

Supplement: emi0017-0829-sd2.pdf [file emi0017-0829-sd2.pdf]
