# Supplementary material
Source: PubMed Central journal article supplement (PMC4409816)
Supplement: emi0017-0829-sd3.pdf [file emi0017-0829-sd3.pdf]

**Table S1.** *Polynucleobacter* strains, geographic origin, and Genbank accession numbers of 16S-23S ITS and glnA sequences.

| Strain          | Habitat                    | Latitude  | Longitude | 16S-23S ITS | glnA     |
|-----------------|----------------------------|-----------|-----------|-------------|----------|
| MWH-Molso1      | Lake Mondsee               | 47.82975  | 13.37609  | AJ550671    | FN823082 |
| MWH-MoK7        | Lake Mondsee               | 47.82975  | 13.37609  | AJ550673    | FN823083 |
| MWH-MoK4        | Lake Mondsee               | 47.82975  | 13.37609  | AJ550654    | FN823084 |
| MWH-JaK3        | Yangtze River              | 32.11440  | 118.73201 | AJ550657    | FN823085 |
| MWH-T1W11       | Humble Park Pond 1         | 31.32588  | 120.62509 | AJ550670    | FN823086 |
| MWH-T2W17       | Humble Park Pond 2         | 31.32588  | 120.62509 | AJ550664    | FN823087 |
| MWH-HuW1        | Tiger Hill Pond            | 31.33745  | 120.57617 | AJ550666    | FN823088 |
| MWH-HuK1        | Tiger Hill Pond            | 31.33745  | 120.57617 | AJ550665    | FN823089 |
| MWH-NZ4W10      | Lake near Mandeville       | -46.00000 | 168.81667 | AM110079    | FN823090 |
| MWH-NZ7W17      | River near Dunedin         | -45.86667 | 170.50000 | AM110083    | FN823091 |
| MWH-NZ4W7a      | Lake near Mandeville       | -46.00000 | 168.81667 | AM110082    | FN823092 |
| MWH-NZ4W4       | Lake near Mandeville       | -46.00000 | 168.81667 | AM110080    | FN823093 |
| MWH-Aus1W7      | Pond, Sydney               | -33.86392 | 151.21750 | AM110081    | FN823094 |
| MWH-Aus1W21     | Pond, Sydney               | -33.86392 | 151.21750 | AM110078    | FN823095 |
| MWH-S4W17       | Loch Ness                  | 57.24119  | -4.52943  | AM110087    | FN823096 |
| MWH-UK1W16      | Unterer Klaffersee         | 47.29770  | 13.79374  | AM110086    | FN823097 |
| QLW-P1DMWA-1    | Pond-1                     | 47.73982  | 13.30167  | AJ879783    | FN823098 |
| QLW-P2DMWB-1    | Pond-2                     | 47.73859  | 13.30163  | FN429654    | FN823099 |
| QLW-P2FAT50C-1  | Pond-2                     | 47.73859  | 13.30163  | FN429655    | FN823100 |
| MWH-P2C2IIa     | Pond-2                     | 47.73859  | 13.30163  | FN429656    | FN823101 |
| QLW-P1DATA-2    | Pond-1                     | 47.73982  | 13.30167  | AJ879801    | FN823102 |
| QLW-P2DMWA-1    | Pond-2                     | 47.73859  | 13.30163  | FN429657    | FN823103 |
| QLW-P1FAT50C-4  | Pond-1                     | 47.73982  | 13.30167  | AJ879778    | FN823104 |
| MWH-LF2-54b     | Lake Loosdrecht            | 52.20442  | 5.08127   | AJ964893    | FN823108 |
| MWH-Gad-W7      | Gaddtjärnen                | 59.86083  | 15.17944  | AM110096    | FN823109 |
| MWH-Gad-W5      | Gaddtjärnen                | 59.86083  | 15.17944  | AM110097    | FN823110 |
| MWH-Mekk-C3     | Mekkojärvi                 | 61.23089  | 25.14203  | AM397065    | FN823111 |
| MWH-Mekk-A1     | Mekkojärvi                 | 61.23089  | 25.14203  | AM110091    | FN823112 |
| MWH-Valk-D1     | Valkea-Kotinen             | 61.23333  | 25.06667  | AM110089    | FN823116 |
| MWH-Valk-A4     | Valkea-Kotinen             | 61.23333  | 25.06667  | AM110090    | FN823117 |
| MWH-Mekk-B1     | Mekkojärvi                 | 61.23089  | 25.14203  | AM110088    | FN823113 |
| MWH-Mekk-A6     | Mekkojärvi                 | 61.23089  | 25.14203  | AM110094    | FN823114 |
| MWH-Svant-W18   | Svarttjärnen               | 59.89000  | 15.25667  | AM110095    | FN823118 |
| MWH-Mekk-D6     | Mekkojärvi                 | 61.23089  | 25.14203  | AM397066    | FN823115 |
| MWH-Braz-FAM2G  | Monjolinho, Pond           | -21.98548 | -47.88088 | AM110113    | FN823119 |
| MWH-Braz-FAM2J  | Monjolinho, Pond           | -21.98548 | -47.88088 | AM110112    | FN823120 |
| MWH-Braz-FAM4A  | Lobo-Broa, Reservoir       | -22.17847 | -47.89534 | AM110111    | FN823121 |
| MWH-Berg-3C6    | Bergerie de l'Arate, Pond  | 42.20229  | 8.93246   | AM110102    | FN823122 |
| MWH-Creno-4B5   | Lac de Creno               | 42.20463  | 8.94588   | AM110105    | FN823123 |
| MWH-Creno-3A4   | Lac de Creno               | 42.20463  | 8.94588   | AM397064    | FN823124 |
| MWH-Creno-4B4   | Lac de Creno               | 42.20463  | 8.94588   | AM110104    | FN823125 |
| MWH-PoolBr-B5   | Brown Rock Pool            | 42.17251  | 8.89848   | AM110107    | FN823126 |
| MWH-Jannik3A3   | Graben                     | 42.08724  | 8.71062   | AM110099    | FN823127 |
| MWH-Jannik3D5   | Graben                     | 42.08724  | 8.71062   | AM110100    | FN823128 |
| MWH-Jannik1A5   | Graben                     | 42.08724  | 8.71062   | AM110101    | FN823129 |
| MWH-Teich-2B6   | Pond close to San Petru    | 42.08454  | 8.73069   | AM110109    | FN823130 |
| czRimov8-C6     | Rimov Reservoir            | 48.84787  | 14.48943  | FN429658    | FN823131 |
| czRimovFAM-D3   | Rimov Reservoir            | 48.84787  | 14.48943  | FN429659    | FN823132 |
| MWH-Loch2D3-15i | Pond Loch2                 | 11.05648  | 108.39759 | FN429660    | FN823133 |
| MT-CBaFAMC5     | Crystal Bog Lake           | 46.00556  | -89.60417 | FN429661    | FN823134 |
| MT-CBbDAM6C2    | Crystal Bog Lake           | 46.00556  | -89.60417 | FN555148    | FN823135 |
| MWH-EgelM1-30-B | Egelsee (M1), nahe Mattsee | 47.96655  | 13.12600  | FN429662    | FN823136 |
| MWH-LakaW10-4   | Lake Jezero Laka           | 49.11133  | 13.32872  | FN429663    | FN823139 |

|                  |                            |          |          |          |          |
|------------------|----------------------------|----------|----------|----------|----------|
| MWH-PRW10-1      | Lake Prášilské             | 49.07548 | 13.40023 | FN429664 | FN823140 |
| MWH-CNW20-3      | Lake Černé                 | 49.18017 | 13.18463 | FN429665 | FN823141 |
| MWH-Mlynsky-W1   | Mlynsky Pond               | 48.71075 | 14.71193 | FN429666 | FN823142 |
| MWH-Lacke-12-2   | Lacke nahe Elmsee          | 47.68493 | 13.95980 | FN429667 | FN823144 |
| MWH-RechtKolB    | Rechteckteich              | 47.07633 | 12.99489 | FN429668 | FN823145 |
| AM-25C3          | Lake Gosh                  | 40.71940 | 45.01573 | FN429669 | FN823148 |
| MWH-UH2A         | Kizekibi swamp             | 0.38333  | 32.17861 | FN429670 | FN823149 |
| MWH-UH2B         | Kizekibi swamp             | 0.38333  | 32.17861 | FN429671 | FN823150 |
| MWH-UH11A        | Kidera wetland             | 1.24833  | 33.04500 | FN429672 | FN823151 |
| MWH-UH14kl       | Budongo Forest creek       | 1.70833  | 31.48528 | FN429673 | FN823152 |
| MWH-UH14B        | Budongo Forest creek       | 1.70833  | 31.48528 | FN429674 | FN823153 |
| MWH-UH14E        | Budongo Forest creek       | 1.70833  | 31.48528 | FN429675 | FN823154 |
| MWH-UH19D        | Lukaya pond                | -0.12806 | 31.91306 | FN429676 | FN823155 |
| MWH-UH21B        | Kagona swamp               | -0.34361 | 31.87500 | FN429677 | FN823156 |
| MWH-UH21F        | Kagona swamp               | -0.34361 | 31.87500 | FN429678 | FN823157 |
| MWH-UH21G        | Kagona swamp               | -0.34361 | 31.87500 | FN429679 | FN823158 |
| MWH-UH23A        | Lyantode pond              | -0.56750 | 30.70028 | FN429680 | FN823159 |
| MWH-UH23C        | Lyantode pond              | -0.56750 | 30.70028 | FN429681 | FN823160 |
| MWH-UH25C        | Kabwohe swamp              | -0.58139 | 30.44806 | FN429682 | FN823161 |
| MWH-UH25E        | Kabwohe swamp              | -0.58139 | 30.44806 | FN429683 | FN823162 |
| MWH-UH35A        | Kyegegwa pond              | 0.52889  | 30.94861 | FN429684 | FN823163 |
| MWH-UH36A        | Mubende wetland            | 0.47528  | 31.62167 | FN429685 | FN823164 |
| MWH-UH38A        | Lake Victoria, Entebbe     | 0.06389  | 32.48000 | FN429686 | FN823165 |
| MWH-UH38Ckl      | Lake Victoria, Entebbe     | 0.06389  | 32.48000 | FN429687 | FN823166 |
| MWH-Feld-100     | Lake Feldsee               | 47.87164 | 8.03378  | FN429688 | FN823167 |
| MWH-P3-07-1      | Pond-3                     | 47.73766 | 13.30236 | FN429689 | FN823106 |
| MWH-P4-07-3      | Pond-4                     | 47.73670 | 13.30214 | FN429690 | FN823107 |
| MWH-Post2-1      | pond Post-2                | 47.65607 | 13.39818 | FN429691 | FN823168 |
| MWH-Post4-6-1    | pond Post-4                | 47.65578 | 13.39838 | FN429692 | FN823169 |
| MWH-K35W1        | Lake Krottensee            | 47.78338 | 13.38693 | FN429693 | FN823170 |
| MWH-CHAdd        | Chalupská slať             | 48.99835 | 13.65870 | FN429694 | FN823171 |
| MWH-Cha5         | Chalupská slať             | 48.99835 | 13.65870 | FN429695 | FN823172 |
| es-EL-1          | Hondo de Elche             | 38.17634 | -0.75872 | FN429696 | FN823173 |
| es-MAR-1         | Marquesado                 | 40.18750 | -1.66722 | FN429697 | FN823174 |
| es-MAR-2         | Marquesado                 | 40.18750 | -1.66722 | FN429698 | FN823175 |
| es-MAR-3         | Marquesado                 | 40.18750 | -1.66722 | FN429699 | FN823176 |
| es-MAR-4         | Marquesado                 | 40.18750 | -1.66722 | FN429700 | FN823177 |
| es-GGE-1         | Grande de Gredos           | 40.25361 | -5.27611 | FN429701 | FN823178 |
| MWH-Tro5-4-8     | pond Trög5                 | 47.24989 | 13.26532 | FN429702 | FN823179 |
| MWH-Tro8-2-5-gr  | pond Trög8                 | 47.24989 | 13.26532 | FN429703 | FN823180 |
| MWH-Groes-1-1    | Grösster Teich             | 47.07677 | 12.99543 | FN429704 | FN823181 |
| MWH-Unterer-4A-  | Unterer Teich              | 47.07752 | 12.98887 | FN429705 | FN823182 |
| MWH-Tro8-2-9     | pond Trög8                 | 47.24989 | 13.26532 | FN429710 | FN823183 |
| MWH-Tro5-3-9     | pond Trög5                 | 47.24989 | 13.26532 | FN429711 | FN823185 |
| MWH-Tro6-4-2     | pond Trög6                 | 47.24989 | 13.26532 | FN429712 | FN823186 |
| MWH-Tro7-1-4     | pond Trög7                 | 47.24989 | 13.26532 | FN429713 | FN823187 |
| MWH-Recht1       | Rechteckteich              | 47.07616 | 12.99489 | FN429706 | FN823146 |
| MWH-Groes-2-3    | Grösster Teich             | 47.07677 | 12.99543 | FN429707 | FN823188 |
| MWH-KleinIns-1B- | Kleiner Inselteich         | 47.07546 | 12.99138 | FN429708 | FN823189 |
| MWH-Recht3       | Rechteckteich              | 47.07616 | 12.99489 | FN429709 | FN823147 |
| MWH-Weng1-1      | Wengmoor                   | 47.92785 | 13.17628 | FN429716 | FN823191 |
| MWH-Hall2        | Hallstättersee             | 47.56374 | 13.66021 | FN429717 | FN823192 |
| MWH-Hall5        | Hallstättersee             | 47.56374 | 13.66021 | FN429718 | FN823193 |
| MWH-Hall10       | Hallstättersee             | 47.56374 | 13.66021 | FN429719 | FN823194 |
| MWH-Gerlos1-1    | Gerlosplatte, Lacke1       | 47.23551 | 12.15430 | FN429720 | FN823195 |
| MWH-Gerlos4-1    | Gerlosplatte, Lacke4       | 47.23487 | 12.15421 | FN429721 | FN823196 |
| MWH-Gerlos5-1    | Gerlosplatte, Lacke5       | 47.23478 | 12.15392 | FN429722 | FN823197 |
| MWH-Gerlos6-1    | Gerlosplatte, Lacke6       | 47.23443 | 12.15428 | FN429723 | FN823198 |
| MWH-EgelM2-6     | Egelsee (M2), near Mattsee | 47.96233 | 13.12470 | FN429724 | FN823137 |

|                 |                             |           |           |          |          |
|-----------------|-----------------------------|-----------|-----------|----------|----------|
| MWH-EgelM2-3    | Egelsee (M2), near Mattsee  | 47.96233  | 13.12470  | FN429725 | FN823138 |
| LimPoW16        | Lake LimnoPolar             | -62.64825 | -61.10508 | HG421771 | HG421822 |
| Klost1-W25      | Klost1, Klosterheden        | 56.46777  | 8.32623   | FN429726 | FN823199 |
| Klost2-W16      | Klost2, Klosterheden        | 56.47118  | 8.29387   | FN429727 | FN823200 |
| Nonnen-W13      | Nonnenmattweiher            | 47.79453  | 7.79897   | FN429728 | FN823201 |
| Nonnen-W15      | Nonnenmattweiher            | 47.79453  | 7.79897   | FN429729 | FN823202 |
| Ross1-W21       | pond Ross1                  | 47.86167  | 13.47694  | FN429730 | FN823203 |
| Ross2-W14       | pond Ross2                  | 47.86219  | 13.47596  | FN429731 | FN823205 |
| Ross6-W10       | pond Ross6                  | 47.86744  | 13.47568  | FN429732 | FN823206 |
| MWH-Tro8-08W11  | pond Trög8                  | 47.24989  | 13.26532  | FN429714 | FN823184 |
| MWH-Adler-W1    | pond Adlerlacke             | 47.37256  | 12.09273  | FN429734 | FN823207 |
| MWH-Tro7-08W8   | pond Trög7                  | 47.24989  | 13.26532  | FN429715 | FN823210 |
| MWH-Adler-W8    | pond Adlerlacke             | 47.37256  | 12.09273  | FN429735 | FN823208 |
| Ross1-W9        | ditch Ross1                 | 47.86167  | 13.47694  | FN429733 | FN823204 |
| MWH-Salz1-W7    | pond Salz1                  | 47.29254  | 12.11094  | FN429737 | FN823211 |
| MWH-Lett3-08W15 | pond Letten3                | 47.36832  | 12.97123  | FN429738 | FN823212 |
| MWH-Adler-W21   | pond Adlerlacke             | 47.37256  | 12.09273  | FN429736 | FN823209 |
| MWH-Illinger-2A | pond Illinger2              | 47.72151  | 13.34776  | FN429739 | FN823213 |
| SM1-W8          | Schwarzes Moos 1            | 48.87219  | 14.98022  | FN429740 | FN823217 |
| Eve-W11         | Everglades, Shark Valley    | 25.74708  | -80.76731 | FN429741 | FN823215 |
| P1-05-14        | Pond-1                      | 47.73982  | 13.30167  | FN556008 | FN823105 |
| MWH-GrInsel-1   | pond Großer Inselteich      | 47.07580  | 12.99057  | FN556009 | FN823190 |
| SM1-W1          | pond Schwarzes Moos 1       | 48.87219  | 14.98022  | FN825821 | FN823214 |
| UB-Somero-W24   | Lake Somero                 | -62.65374 | -61.12373 | HG421772 | HG421823 |
| UB-Maderos-W3   | Lake Maderos                | -62.66300 | -61.17699 | HG421773 | HG421824 |
| UB-Maderos-W12A | Lake Maderos                | -62.66300 | -61.17699 | HG421774 | HG421825 |
| UB-Refugio-W16  | Lake Refugio                | -62.66319 | -61.01180 | HG421775 | HG421826 |
| UB-Chica-W4A    | Lake Chica                  | -62.65750 | -61.10917 | HG421776 | HG421827 |
| UB-Chica-W24    | Lake Chica                  | -62.65750 | -61.10917 | HG421777 | HG421828 |
| UB-Juka-W19     | Jukajärvi                   | 61.89200  | 27.82167  | FN825822 | FN823216 |
| UB-Kaiv-W7      | Kaivoslampi                 | 63.33542  | 28.83206  | FN825823 | FN823218 |
| UB-Lampi-W7     | Lampi near Venejärvi        | 63.95392  | 29.50619  | FN825824 | FN823219 |
| UB-Raua-W9      | Rauanjärvi                  | 63.10422  | 29.29133  | FN825825 | FN823220 |
| UB-Siik-W21     | Siikajärvi                  | 63.21508  | 28.39342  | FN825826 | FN823221 |
| UB-Siik-W7      | Siikajärvi                  | 63.21508  | 28.39342  | FN825827 | FN823222 |
| UB-Tiil-W10     | Tiilikka                    | 63.64906  | 28.31192  | FN825828 | FN823223 |
| UB-Vapi-W8      | Valkealampi                 | 63.31519  | 28.87431  | FN825829 | FN823224 |
| UB-Vilj-W20     | Viljus                      | 61.91844  | 28.03544  | FN825830 | FN823225 |
| UB-Mula-W16     | Mula                        | 62.29283  | 27.85300  | FN825831 | FN823226 |
| UB-Rupi-W24     | pond near Rupiki (nameless) | 63.49322  | 28.83349  | FN825832 | FN823227 |
| UB-Rupi-W1      | pond near Rupiki (nameless) | 63.49322  | 28.83349  | FN825833 | FN823228 |
| UB-Blato-W12    | Cervene Blato               | 48.86010  | 14.81168  | FN825836 | FN823143 |
| UB-Maderos-W6   | Lake Maderos                | -62.66300 | -61.17699 | HG421791 | HG421842 |
| UB-LimW2        | Lake LimnoPolar             | -62.64825 | -61.10508 | HG421792 | n.d.     |
| UB-Domo-W1      | Lake Domo                   | -62.64806 | -60.98207 | HG421793 | HG421844 |
| UB-Kamb-W5      | Ankor Wat, ditch            | 13.41245  | 103.86023 | FN825837 | FN823231 |
| UB-Kamb-W7b     | Ankor Wat, ditch            | 13.41245  | 103.86023 | FN825838 | FN823232 |
| UB-Kamb-W7a     | Ankor Wat, ditch            | 13.41245  | 103.86023 | FN825839 | FN823233 |
| UB-Piko-W3      | Pien-Koikka                 | 63.13242  | 27.80925  | FN825834 | FN823229 |
| UB-Petae-W23    | Petäisjoki                  | 63.32886  | 28.82089  | FN825835 | FN823230 |
| UK-BL3-W12      | Blindensee                  | 48.07439  | 9.53901   | FR682912 | FR682909 |
| UK-BL2-W11      | Blindensee                  | 48.07439  | 9.53901   | FR682911 | FR682910 |
| UK-Kesae-W10    | Kesälampi                   | 63.24950  | 26.97603  | HG421778 | HG421829 |
| UK-Long2-W17    | Longyearbyen Pond 2         | 78.21857  | 15.69481  | HG421821 | n.d.     |
| UK-Maja-W20     | Majalampi                   | 63.21125  | 26.82685  | HG421779 | HG421830 |
| UK-Pondora-W13  | Pandora pond                | 63.47487  | 27.42527  | HG421780 | HG421831 |
| UK-Pondora-W15  | Pandora pond                | 63.47487  | 27.42527  | HG421781 | HG421832 |
| UK-Piela-W12    | Pielavesi                   | 63.35410  | 26.42725  | HG421782 | HG421833 |
| UK-Piela-W13    | Pielavesi                   | 63.35410  | 26.42725  | HG421783 | HG421834 |

|                |                              |          |          |          |          |
|----------------|------------------------------|----------|----------|----------|----------|
| UK-Ruja-W24    | Rujalampi                    | 63.23958 | 26.98507 | HG421784 | HG421835 |
| UK-Tiil2-W2    | Tiilikka                     | 63.64912 | 28.31185 | HG421785 | HG421836 |
| UK-Gri1-W3     | pond Grimselpass, Gri1       | 46.55339 | 8.33544  | HG421786 | HG421837 |
| UK-Kesae-W13   | Kesälampi                    | 63.24950 | 26.97603 | HG421787 | HG421838 |
| UK-Loeyt-W23   | Löytänä                      | 63.40243 | 26.85395 | HG421788 | HG421839 |
| MG-4-Mela-C2   | not known                    | 63.09506 | 30.12842 | HG421789 | HG421840 |
| MG-4-Mela-E1   | not known                    | 63.09506 | 30.12842 | HG421790 | HG421841 |
| MG-4-Mela-F3   | not known                    | 63.09506 | 30.12842 | n.d.     | HG421843 |
| MG-8-Puso-13   | not known                    | 62.95628 | 29.87550 | HG421794 | HG421845 |
| MG-27-Goln-C1  | not known                    | 70.06783 | 29.98053 | HG421795 | HG421846 |
| MG-27-Goln-C3  | not known                    | 70.06783 | 29.98053 | HG421796 | HG421847 |
| MG-52-Enon2-B3 | not known                    | 68.34889 | 24.13167 | HG421797 | HG421848 |
| MG-52-Enon2-B4 | not known                    | 68.34889 | 24.13167 | HG421798 | HG421849 |
| MG-63-Kera-F1  | Keräntöjärvi                 | 67.66008 | 22.90206 | HG421799 | HG421850 |
| MG-65-Swed-E4  | not known                    | 66.77272 | 23.14856 | HG421800 | HG421851 |
| MG-6-Vaara-E2  | Väärälampi                   | 63.09731 | 29.66608 | HG421801 | HG421852 |
| MG-7-Harju-B2  | not known                    | 63.00797 | 29.75319 | HG421802 | HG421853 |
| MG-8-Puso-B2   | not known                    | 62.95628 | 29.87550 | HG421803 | HG421854 |
| MG-22-Aci1-F1  | not known                    | 69.13086 | 27.76061 | HG421804 | HG421855 |
| MG-25-Pas1-D2  | not known                    | 69.44558 | 29.90306 | HG421805 | HG421856 |
| MG-25-Pas1-F1  | not known                    | 69.44558 | 29.90306 | HG421806 | HG421857 |
| MG-28-Ekke-A2  | not known                    | 70.07119 | 30.11672 | HG421807 | HG421858 |
| MG-43-Slet-D2  | not known                    | 71.09475 | 28.18311 | HG421808 | HG421859 |
| MG-43-Slet-F1  | not known                    | 71.09475 | 28.18311 | HG421809 | HG421860 |
| MG-58-Narv-E3  | not known                    | 68.53425 | 17.29506 | HG421810 | HG421861 |
| MG-Unter1-9    | Lake Egelsee (near Attersee) | 47.83273 | 13.50404 | HG421811 | HG421862 |
| MG-Unter2-12   | Lake Egelsee (near Attersee) | 47.83273 | 13.50404 | HG421812 | HG421863 |
| MG-Unter2-18   | Lake Egelsee (near Attersee) | 47.83273 | 13.50404 | HG421813 | HG421864 |
| MG-5-Ahmo-C2   | not known                    | 63.08494 | 29.58561 | HG421814 | HG421865 |
| MG-58-Narv-B1  | not known                    | 68.53425 | 17.29506 | HG421815 | HG421866 |
| MG-42-Nopo-D3  | not known                    | 71.08494 | 28.16397 | HG421816 | HG421867 |
| MG-65-Swed-B2  | not known                    | 66.77272 | 23.14856 | HG421817 | HG421868 |
| MG-54-Pals-D4  | not known                    | 68.72422 | 21.42044 | HG421818 | HG421869 |

---
