# Supplementary material
Source: PubMed Central journal article supplement (PMC4409816)
Supplement: emi0017-0829-sd4.pdf [file emi0017-0829-sd4.pdf]

**Supplementary Materials Table S2.** Detection of *Polynucleobacter necessarius* ssp. *asymbioticus* subgroups by Reverse Line Blot Hybridization (RLBH) in habitats located in Uganda. Only results for those 22 samples, which yielded PCR products are shown. For details on the methods and RLBH probes see Jezbera et al., 2011.

| Site                      | F1 | F2 | F4 | F5 | F10 | F11 | F12 | F13n | F14 | F15 | F15-1 | F16 | F17 | Hybridization intensity |
|---------------------------|----|----|----|----|-----|-----|-----|------|-----|-----|-------|-----|-----|-------------------------|
| Kabwohe wetland, Mbarara  |    |    |    |    |     |     |     | vs   | vw  |     |       |     |     | very strong vs          |
| Kizekibi swamp            |    |    |    |    |     |     |     | vs   |     |     |       |     |     | strong                  |
| Kagona wetland, Masaka    |    |    |    |    |     |     |     | vs   | vw  |     |       | vw  |     | average                 |
| Kigwe, stream wetland     |    |    |    |    |     |     |     | vs   | vw  |     |       |     |     | weak                    |
| Kasana wetland            |    |    |    |    |     |     |     | vs   | vw  |     |       |     |     | very weak vw            |
| Budongo forest swamp      |    |    |    |    |     |     |     | vs   | vw  |     |       |     |     | no signal               |
| Lake Nabugabo             |    |    |    |    |     | vs  | vs  | vs   |     |     |       |     |     |                         |
| Kagoma, Jinja swamp       |    |    |    |    |     |     |     |      |     |     |       |     |     |                         |
| Buwera swamp, Kamuli      |    |    |    |    |     | vw  |     | vs   |     | vw  |       |     |     |                         |
| Kiyanja swamp             |    |    |    |    |     |     |     | vs   | vw  | vw  |       |     |     |                         |
| Lwera wetland, Lukaya     |    |    |    |    |     |     |     | vs   | vw  |     |       | vw  |     |                         |
| Kyazanga, Masaka          |    |    |    |    |     |     |     | vs   |     |     |       |     |     |                         |
| Kinyara small river       |    |    |    |    |     |     | vs  | vs   |     |     |       |     |     |                         |
| Musuno swamp, Kamuli      |    |    |    |    |     | vw  |     | vs   |     | vw  |       | vw  |     |                         |
| Masindi port wetland      |    |    |    |    |     | vw  |     | vs   | vw  |     |       | vw  |     |                         |
| Nyakibere crater Lake     |    |    |    |    |     |     |     |      |     |     |       |     |     |                         |
| Batesi, Lake Wamala       |    |    |    |    |     | vw  | vw  | vs   |     |     |       |     |     |                         |
| Nkuruba crater Lake       |    |    |    |    |     |     |     |      |     |     |       |     |     |                         |
| Butiaba, Lake Albert      |    |    |    |    |     |     |     | vs   |     | vw  |       |     |     |                         |
| Kasenyi, Lake George      |    |    |    |    |     |     |     | vs   |     |     |       |     |     |                         |
| Kazinga channel, Bushenyi |    |    |    |    |     |     |     | vs   | vw  |     |       |     |     |                         |
| Katwe, Lake Edward        |    |    |    |    |     |     |     | vw   |     |     |       |     |     |                         |
